# Supplementary material
Source: PubMed Central journal article supplement (PMC2940492)
Supplement: en.2010-0401_1.pdf [file en.2010-0401_1.pdf]

|                                 | DR NL        | DR LL       |
|---------------------------------|--------------|-------------|
| 10wk chow                       |              |             |
| Body weight                     | 339+5        | 335+10      |
| Body weight gain                |              |             |
| TFP%BW                          | 3.36+0.20    | 3.42+0.18   |
| Leptin (ng/ml)                  | 4.6+0.2      | 4.4+0.2     |
| Insulin (ng/ml)                 | 2.1+0.3      | 2.0+0.2     |
| Glucose OGTT AUC (mg/dl/120min) | 11,300+1010  | 11,150+950  |
|                                 |              |             |
| 5wk HE diet                     |              |             |
| Body weight                     | 491+18       | 472+14      |
| Body weight gain                | 152+8        | 130+8       |
| FI on HE (kcal)                 |              |             |
| Total fat pad/body weight (%)   | 7.50+0.49    | 7.63+0.60   |
| Leptin (ng/ml)                  | 6.76+0.7     | 6.51+0.6    |
| Insulin (ng/ml)                 | 2.3+0.2      | 2.3+0.2     |
| Glucose OGTT AUC (mg/dl/120min) | 12,100+1,150 | 12,050+1,00 |

**Table 1:** Five groups of DR male neonates were placed in NL (10 pups/dam) or LL (16 pups/dam) at P2 and fed chow from weaning to 10 wk of age and then fed HE diet for 5 wk. During the last weeks on chow and HE diet, they underwent an oral glucose tolerance test (OGTT) for measurement of glucose responses. Total fat pad/ body weight (%) = total weight of 4 fat pads (retroperitoneal, perirenal, mesenteric, epididymal) as a percent of body weight).

## Supplemental1 Figure Legends

**Figure 1.** Plasma insulin levels at dark (D) and light (L) onset on days P3, 8 and 14 in groups (n=4/group) of DIO pups reared in NL and LL. \*P=0.05 or less for differences between NL and LL plasma leptin levels

**Figure 2.** Effect of leptin intragastric gavage on plasma leptin levels in DIO pups reared in large litters (LL). Baseline leptin levels were obtained in groups (n=4/group) of P4 pups raised in normal litters (NL; 10 pups/dam) and LL (16 pups/dam) at dark onset (time=0 Hours) and the 2 and 4 h later after the LL pups had been gavaged with 100 ng leptin in 0.2 ml leptin. \*P=0.05 or less for differences between NL and LL plasma leptin levels.

SUPPLEMENTARY FIGURES

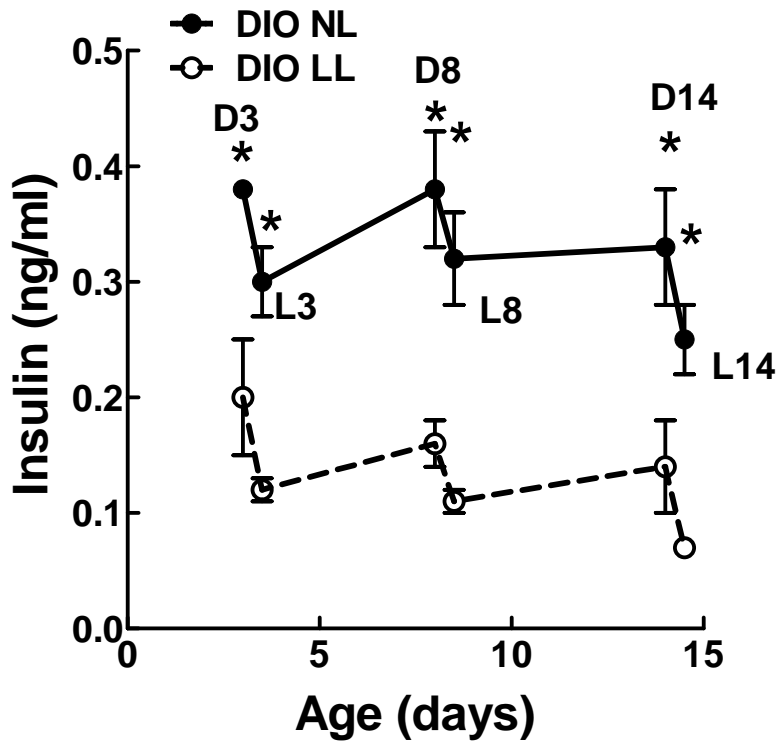

Figure 1

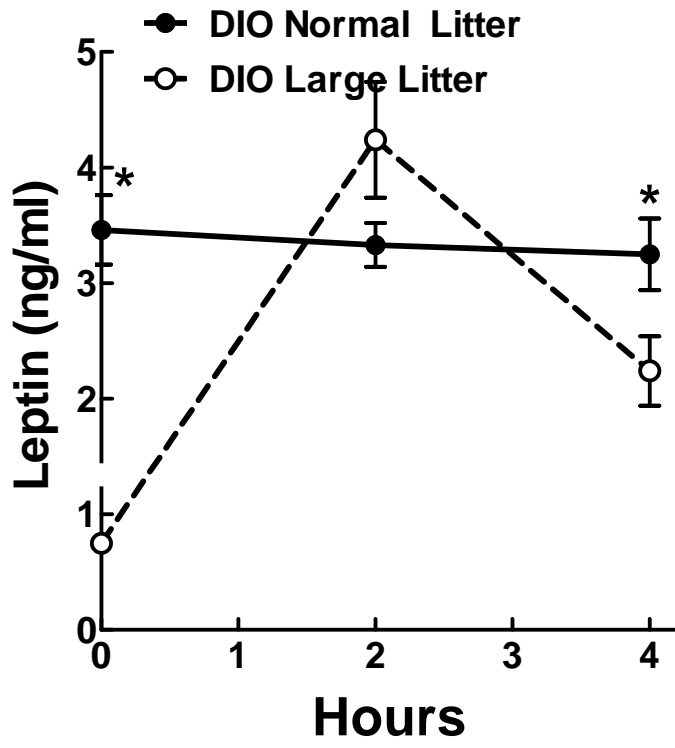

Figure 2
